# Supplementary material
Source: PubMed Central journal article supplement (PMC4842341)

**a**

HEK/GIRK clone 31

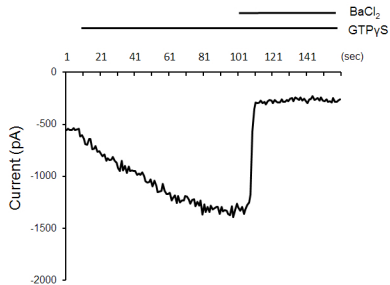**b**HEK/GIRK/mGlu<sub>2</sub>R clone 59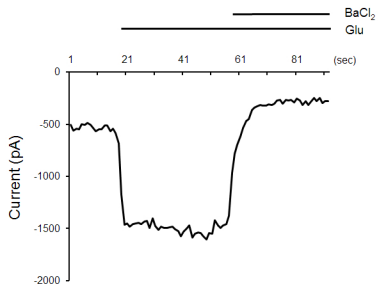

Supplement: NIHMS752466-supplement-424_2015_1780_MOESM1_ESM.pdf [file NIHMS752466-supplement-424_2015_1780_MOESM1_ESM.pdf]

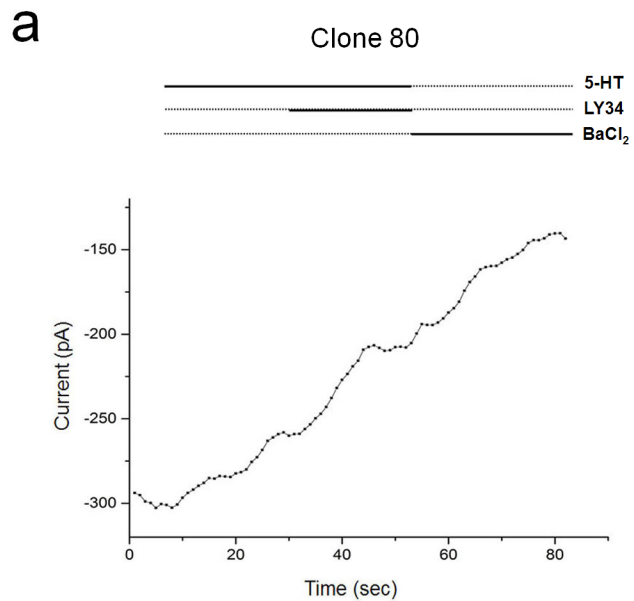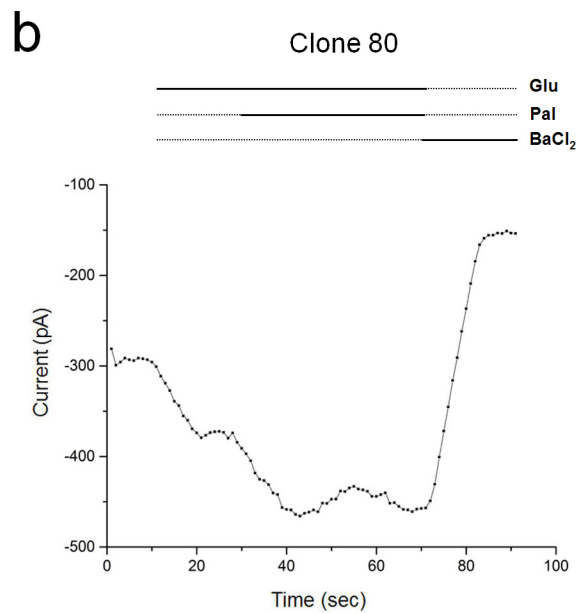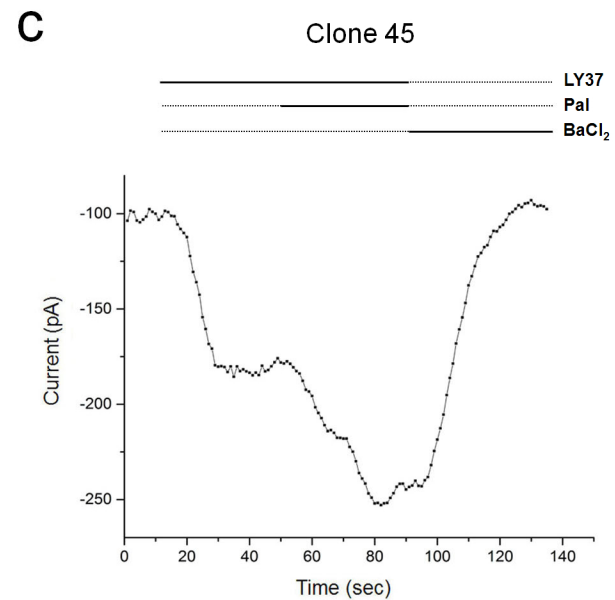

Supplement: NIHMS752466-supplement-424_2015_1780_MOESM5_ESM.pdf [file NIHMS752466-supplement-424_2015_1780_MOESM5_ESM.pdf]
